# Supplementary material
Source: Springer Nature journal article supplement (https://www.springermedizin.de/resource/supplementary/13099_2012_65_MOESM4_ESM.pdf/9665478)

MPO (Units/2cm colon)

1 2 3 4 5

Vehicle/ No *C. difficile*  
n = 6

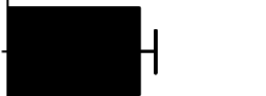

Vehicle/*C. difficile*/No Vanco  
n = 7

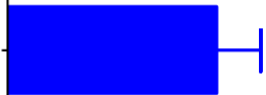

Vehicle/*C. difficile*/Vanco  
n = 29

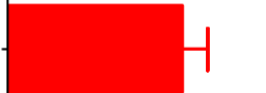

BC30/*C. difficile*/Vanco  
n = 28

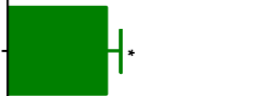

Supplement: MOESM4 [file 9665478]
